# Supplementary material for: Comparing the Synergistic and Antagonistic Interactions of Ciprofloxacin and Levofloxacin Combined with Rifampin against Drug-Resistant Staphylococcus aureus: A Time–Kill Assay
Source: MDPI journal article supplement (doi:10.3390/antibiotics12040711), 2023-04-06

## Supplementary Materials

**Table S1** The median and interquartile range of viable bacterial counts after exposure to antibacterial agents (1× MIC) for a specific time period

|                             | Median (interquartile range) log CFU/ml |                          |                            |                            |
|-----------------------------|-----------------------------------------|--------------------------|----------------------------|----------------------------|
|                             | 0h                                      | 4h                       | 8h                         | 24h                        |
| Control                     | 6.135<br>(5.915 – 6.298)                | 7.615<br>(6.312 – 8.527) | 8.695<br>(5.930 – 9.255)   | 9.665<br>(5.830 – 10.217)  |
| Rifampin                    | 6.135<br>(6.000 – 6.300)                | 6.530<br>(4.935 – 7.160) | 5.850<br>(3.792 – 7.178)   | 6.535<br>(4.527 – 8.992)   |
| Ciprofloxacin               | 6.130<br>(5.938 – 6.300)                | 6.800<br>(6.485 – 7.190) | 6.700<br>(5.340 – 7.265)   | 6.975<br>(5.860 – 8.205)   |
| Levofloxacin                | 6.115<br>(5.945 – 6.287)                | 4.320<br>(3.540 – 5.875) | 3.090**<br>(1.560 – 3.510) | 5.835<br>(4.060 – 6.820)   |
| Rifampin<br>+ Ciprofloxacin | 6.050<br>(5.992 – 6.255)                | 5.850<br>(4.482 – 6.348) | 5.830<br>(3.985 – 6.155)   | 3.385*<br>(0.3525 – 3.955) |
| Rifampin<br>+ Levofloxacin  | 6.110<br>(5.982 – 6.282)                | 6.135<br>(4.620 – 6.327) | 4.600<br>(3.980 – 5.855)   | 3.660*<br>(3.143 – 4.235)  |

\* Synergy

\*\* Bactericidal

**Table S2** The median and interquartile range of viable bacterial counts after exposure to antibacterial agents (0.5× MIC) for a specific time period

|                             | Median (interquartile range) log CFU/ml |                          |                          |                             |
|-----------------------------|-----------------------------------------|--------------------------|--------------------------|-----------------------------|
|                             | 0h                                      | 4h                       | 8h                       | 24h                         |
| Control                     | 6.150<br>(5.945 – 6.320)                | 8.595<br>(8.390 – 8.870) | 9.425<br>(9.245 – 9.785) | 10.210<br>(10.110 – 10.260) |
| Rifampin                    | 6.135<br>(5.952 – 6.325)                | 6.010<br>(5.537 – 6.550) | 6.005<br>(4.353 – 6.282) | 7.525<br>(4.650 – 9.447)    |
| Ciprofloxacin               | 6.160<br>(5.985 – 6.320)                | 7.045<br>(6.820 – 7.312) | 7.285<br>(6.770 – 7.630) | 9.265<br>(7.465 – 9.960)    |
| Levofloxacin                | 6.100<br>(5.965 – 6.287)                | 6.235<br>(4.803 – 7.565) | 5.370<br>(3.720 -7.735)  | 9.385<br>(7.383 – 10.137)   |
| Rifampin<br>+ Ciprofloxacin | 6.120<br>(5.963 – 6.277)                | 6.310<br>(5.840 – 6.537) | 5.830<br>(4.220 – 6.185) | 3.970*<br>(3.502 – 6.055)   |
| Rifampin<br>+ Levofloxacin  | 6.085<br>(5.960 – 6.260)                | 6.030<br>(4.872 – 6.287) | 5.870<br>(4.495 – 6.317) | 4.415<br>(3.627 – 6.130)    |

\* Synergy

**Figure S1** Antibacterial activity of rifampin combined with ciprofloxacin or levofloxacin against drug-resistant *Staphylococcus aureus* strains (mean CFU/mL with standard deviation). MIC, minimum inhibitory concentration; RIF, rifampin; CIP, ciprofloxacin; LVX, levofloxacin

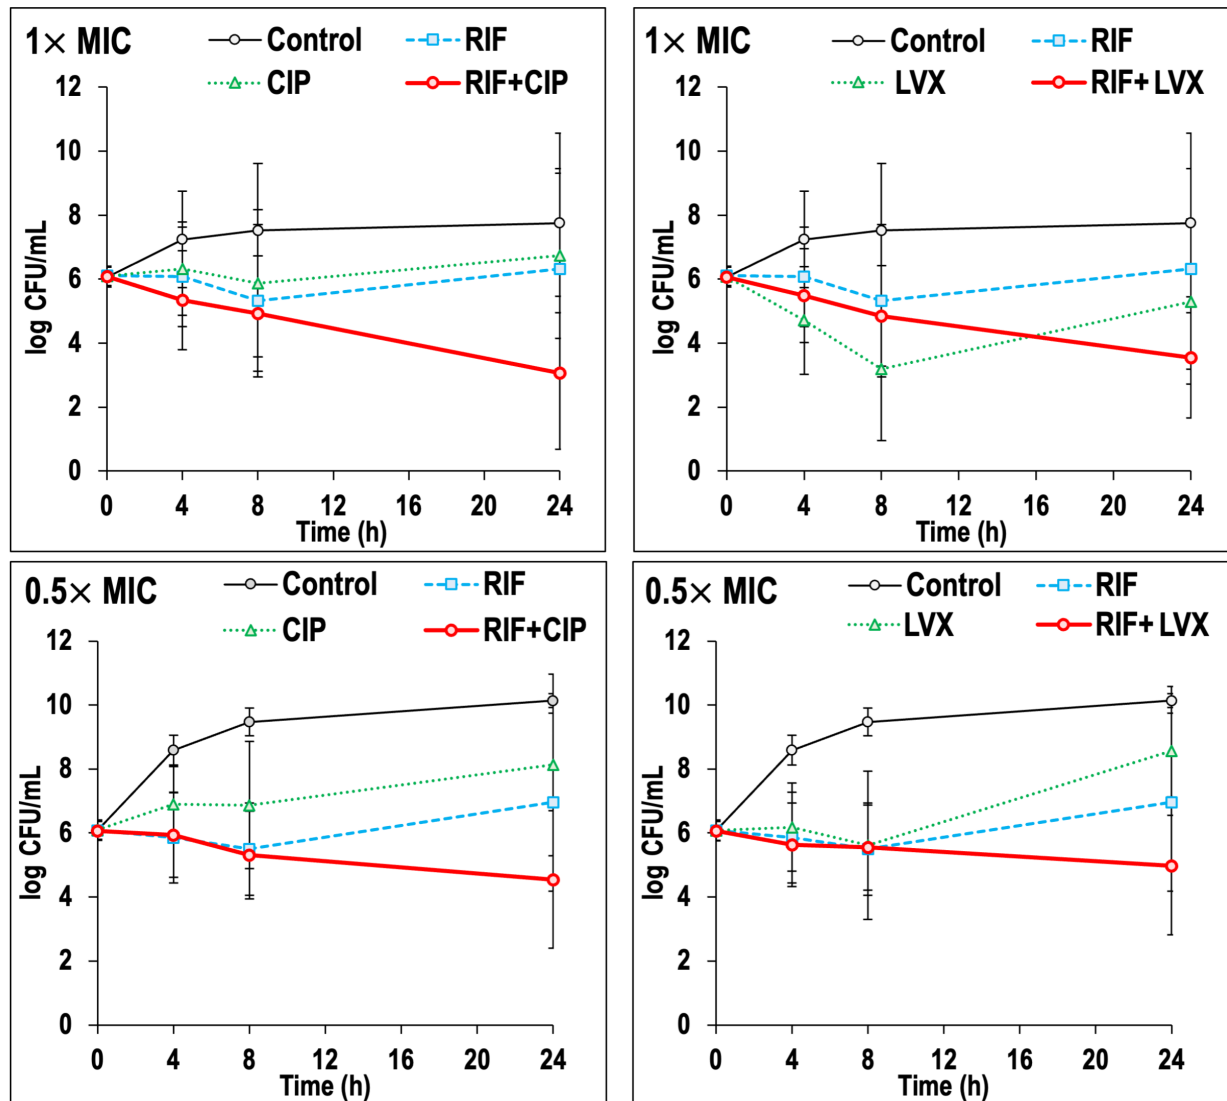

Supplement: s1 [file s1]
